# Supplementary material for: Comparison of Mendeliome exome capture kits for use in clinical diagnostics
Source: PubMed Central journal article supplement (PMC7039898; doi:10.1038/s41598-020-60215-y), 2020-02-24

**Title:** Comparison of Mendeliome exome capture kits for use in clinical diagnostics

**Authors:** Reuben J. Pengelly<sup>1\*</sup>, Daniel Ward<sup>2</sup>, David Hunt<sup>3</sup>, Christopher Mattocks<sup>2</sup>, Sarah Ennis<sup>1</sup>

1. Human Genetics and Genomic Medicine, Faculty of Medicine, University of Southampton, Southampton, UK
2. National Genetics Reference Laboratory (Wessex), Salisbury District Hospital, Salisbury, UK.
3. Wessex Clinical Genetics Service, Princess Anne Hospital, Southampton, UK

\*Corresponding. [R.J.Pengelly@soton.ac.uk](mailto:R.J.Pengelly@soton.ac.uk)

# Forward

# Reverse

SSFE

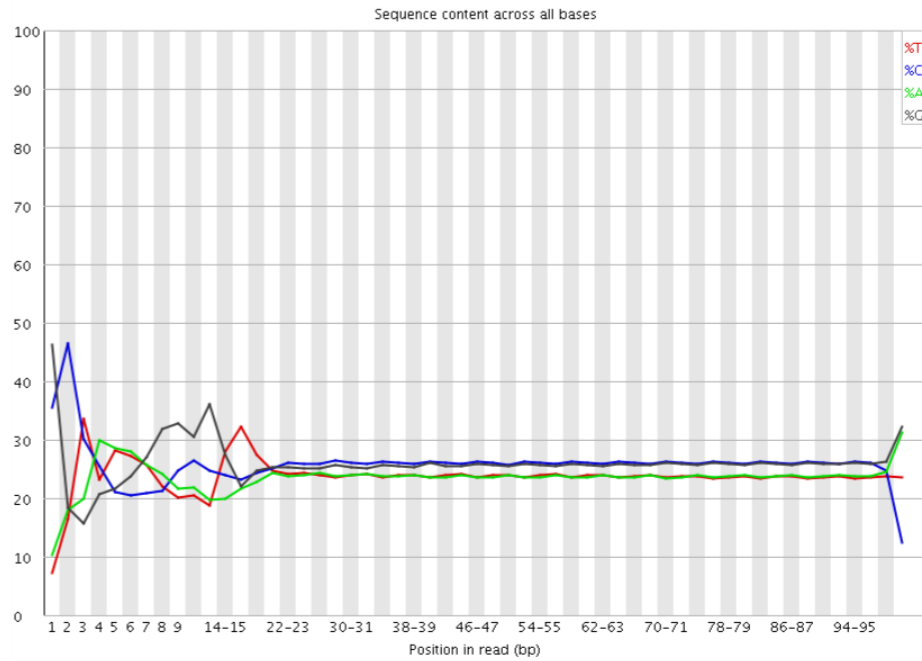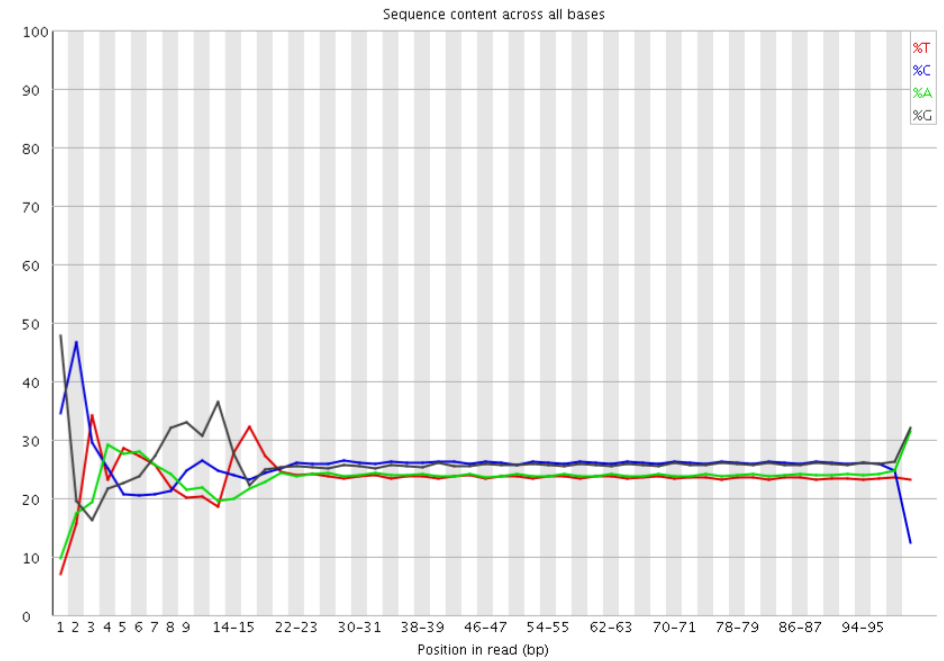

TSO

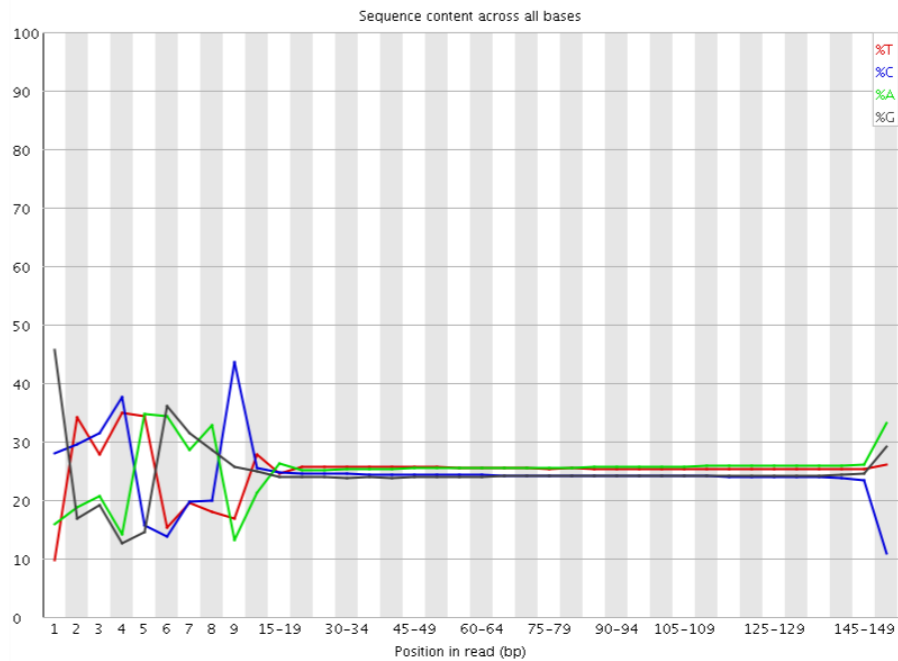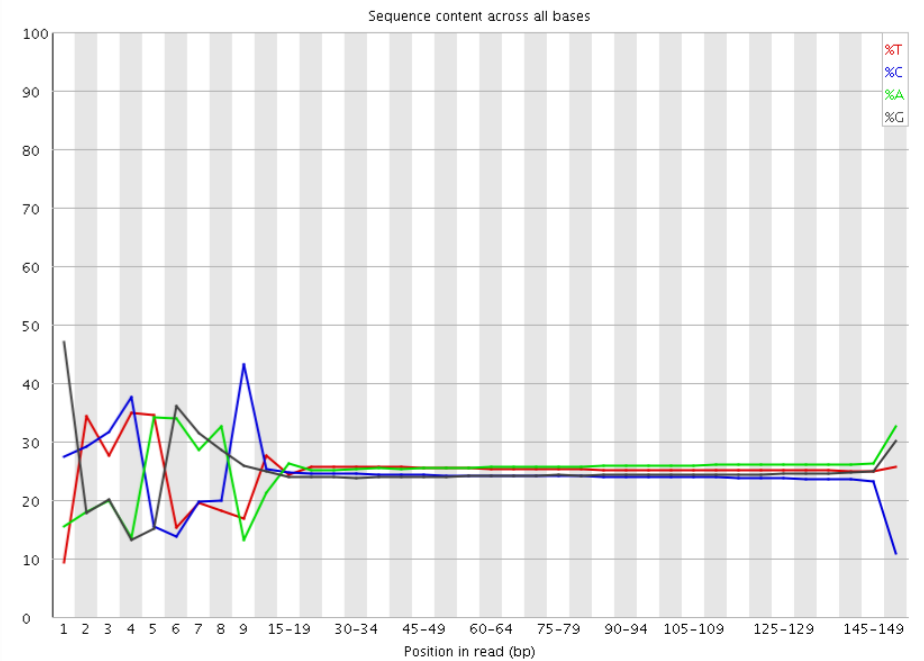

Supplement: 41598_2020_60215_MOESM1_ESM.pdf [file 41598_2020_60215_MOESM1_ESM.pdf]
